# Supplementary material
Source: ML conference proceedings conference paper supplement (https://openreview.net/forum?id=dSjCFKiEdK)
Supplement: supplementary_material [file attachment]

# SUPPLEMENTARY MATERIAL OF INSTRUCTBRUSH: LEARNING ATTENTION-BASED VISUAL INSTRUCTION FOR IMAGE EDITING

**Anonymous authors**

Paper under double-blind review

## 1 RUN TIME COMPARISON

Table 1: **Run time comparison.** We measure the performance of our method against several other methods based on run time.

| Method              | Training  | Optimization | Inference |
|---------------------|-----------|--------------|-----------|
| IP2P+GPT-4o         | >200hours | -            | 20s       |
| Analogist           | -         | -            | 20s       |
| Visii               | -         | 8min         | 10s       |
| <b>Ours (basic)</b> | -         | 4min         | 10s       |
| <b>Ours</b>         | -         | 20min        | 10s       |

## 2 VISUALIZATION OF BENCHMARK

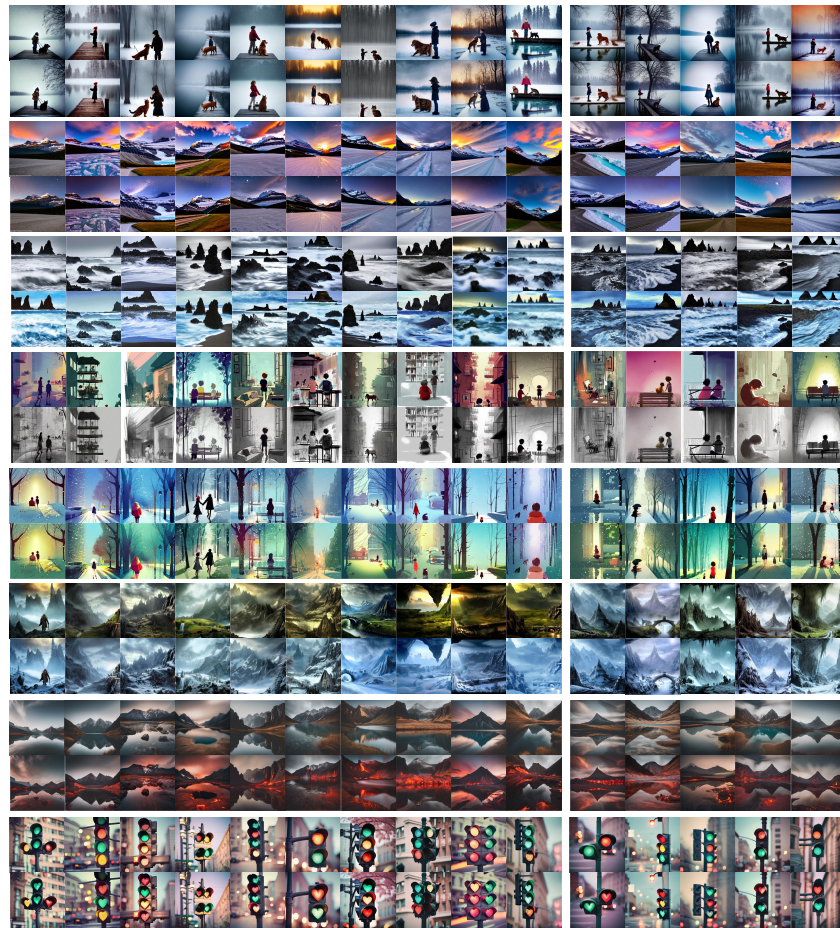

Figure 1: **TOP-Bench**. We visualize the proposed benchmark.

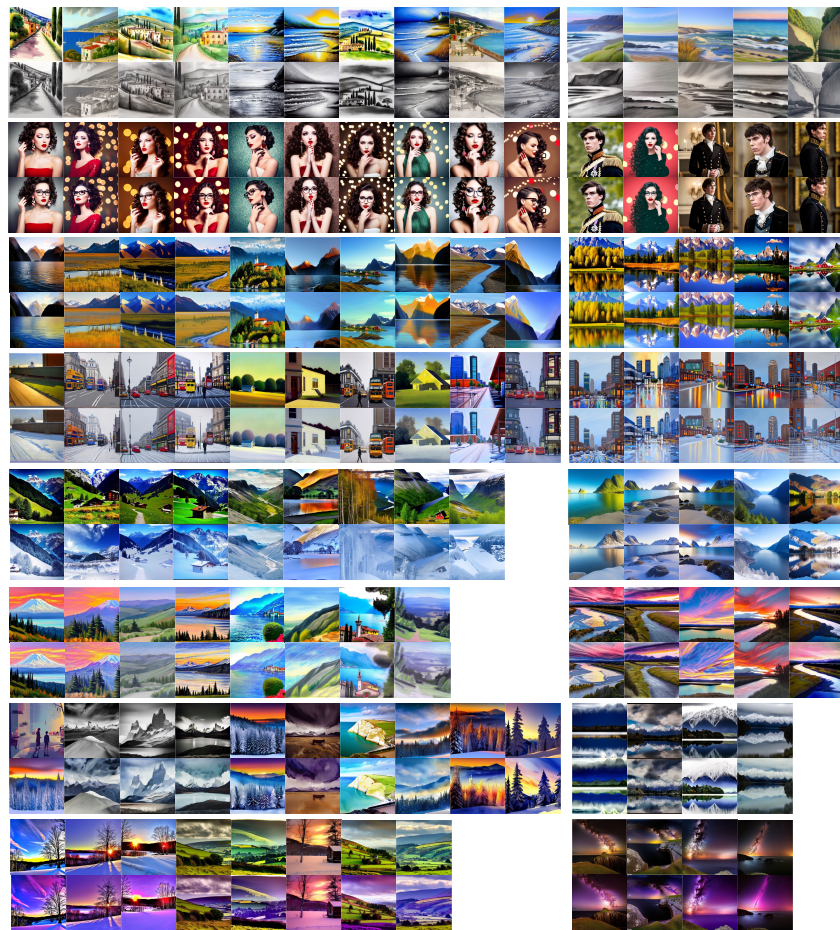

Figure 2: **TOP-Bench**. We visualize the proposed benchmark.

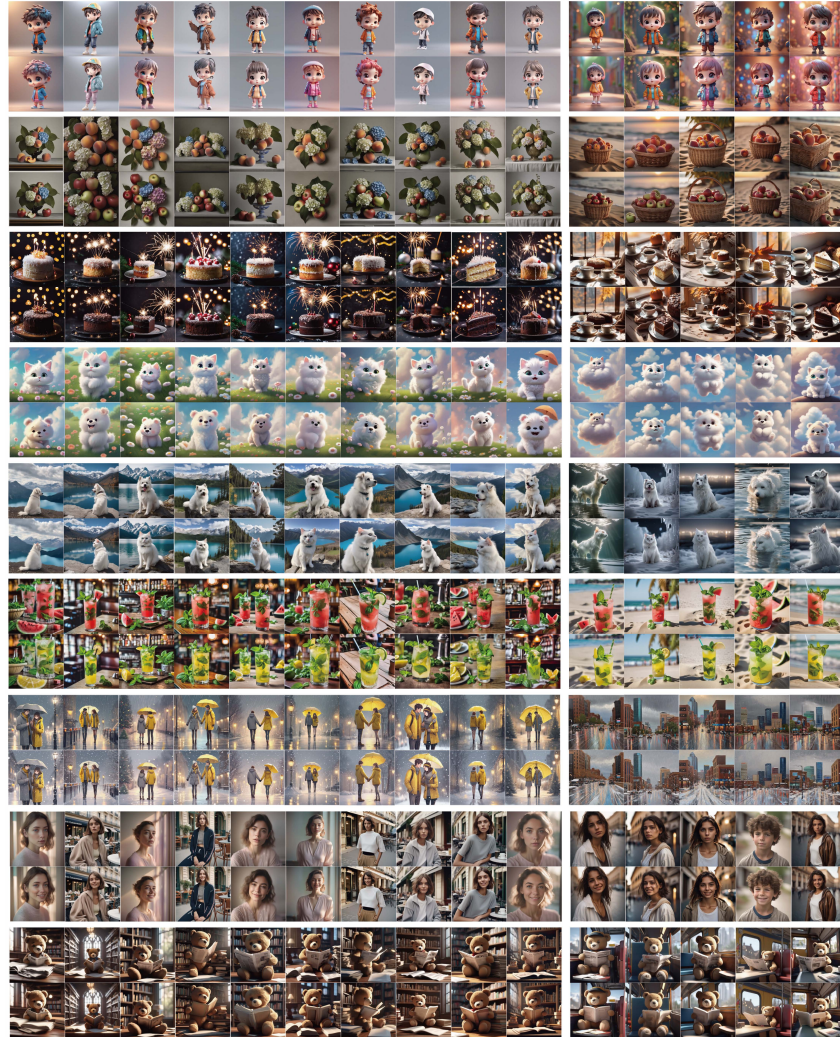

Figure 3: **TOP-Bench**. We visualize the proposed benchmark.
